# Supplementary material
Source: PubMed Central journal article supplement (PMC7209062)
Supplement: rspb20192951supp1.pdf [file rspb20192951supp1.pdf]

## Model comparison and output for Experiment 1

### Null models exploring best random structure

```
glmm1<-glmer(y~1+(1|birdID), family = poisson(link="log"), data=df)
glmm2<-glmer(y~1+(1|birdID)+(1|order), family = poisson(link="log"), data=df)
glmm3<-glmer(y~1+(order|birdID), family = poisson(link="log"), data=df)
glmm4<-glmer(y~1+(1|SEL_LINE/birdID), family = poisson(link="log"), data=df)
glmm5<-glmer(y~1+(1+1|SEL_LINE/birdID), family = poisson(link="log"), data=df)
glmm6<-glmer(y~1+(1|SEL_LINE/birdID)+(1|order), family = poisson(link="log"), data=df)
glmm7<-glmer(y~1+(1+1|SEL_LINE/birdID)+(1|order), family = poisson(link="log"), data=df)
```

### Null model comparison (selecting model with lowest AIC-value)

#### Approach latency (in seconds)

|       | df | AICc     |
|-------|----|----------|
| glmm1 | 2  | 778.5501 |
| glmm2 | 3  | 606.9332 |
| glmm3 | 4  | 203.1338 |
| glmm4 | 3  | 781.4644 |
| glmm5 | 3  | 781.4644 |
| glmm6 | 4  | 610.2844 |
| glmm7 | 4  | 610.2844 |

#### Attack latency (in seconds)

|       | df | AICc     |
|-------|----|----------|
| glmm1 | 2  | 466.0373 |
| glmm2 | 3  | 412.5194 |
| glmm3 | 4  | 202.4106 |
| glmm4 | 3  | 468.9515 |
| glmm5 | 3  | 468.9515 |
| glmm6 | 4  | 415.8820 |
| glmm7 | 4  | 415.8820 |

### Summary of full model with simplest random structure

```
glmer(y~SEL_LINE+noisetreatment+(1|birdID), family = poisson(link="log"), data=df)
```

#### Approach latency

Random effects:

| Groups Name        | Variance | Std.Dev. |
|--------------------|----------|----------|
| birdID (Intercept) | 1.098    | 1.048    |

Number of obs: 34, groups: birdID, 17

Fixed effects:

|                     | Estimate | Std. Error | z value | Pr(> z )   |
|---------------------|----------|------------|---------|------------|
| (Intercept)         | 3.83332  | 0.39881    | 9.612   | <2e-16 *** |
| SEL_LINESE          | 1.18641  | 0.51882    | 2.287   | 0.0222 *   |
| noisetreatmentnoise | 0.24144  | 0.02425    | 9.956   | <2e-16 *** |

### Attack latency

Random effects:

| Groups Name        | Variance | Std.Dev. |
|--------------------|----------|----------|
| birdID (Intercept) | 1.316    | 1.147    |

Number of obs: 34, groups: birdID, 17

Fixed effects:

|                     | Estimate | Std. Error | z value | Pr(> z )     |
|---------------------|----------|------------|---------|--------------|
| (Intercept)         | 4.19188  | 0.43567    | 9.622   | < 2e-16 ***  |
| SEL_LINESE          | 0.93782  | 0.56728    | 1.653   | 0.098295 .   |
| noisetreatmentnoise | 0.08197  | 0.02263    | 3.621   | 0.000293 *** |

### Summary of full model with best fitted random structure

`glmer(y~SEL_LINE+noisetreatment+(order|birdID), family = poisson(link="log"), data=df)`

### Approach latency

Random effects:

| Groups Name        | Variance | Std.Dev. | Corr  |
|--------------------|----------|----------|-------|
| birdID (Intercept) | 1.3070   | 1.1432   |       |
| order              | 0.4732   | 0.6879   | -0.52 |

Number of obs: 34, groups: birdID, 17

Fixed effects:

|                     | Estimate | Std. Error | z value | Pr(> z )     |
|---------------------|----------|------------|---------|--------------|
| (Intercept)         | 3.8050   | 0.4081     | 9.325   | < 2e-16 ***  |
| SEL_LINESE          | 0.7717   | 0.5762     | 1.339   | 0.180446     |
| noisetreatmentnoise | 0.5778   | 0.1674     | 3.453   | 0.000555 *** |

### Attack latency

Random effects:

| Groups Name        | Variance | Std.Dev. | Corr  |
|--------------------|----------|----------|-------|
| birdID (Intercept) | 2.2226   | 1.4908   |       |
| order              | 0.8175   | 0.9042   | -0.63 |

Number of obs: 34, groups: birdID, 17

Fixed effects:

|                     | Estimate | Std. Error | z value | Pr(> z )     |
|---------------------|----------|------------|---------|--------------|
| (Intercept)         | 4.1903   | 0.5249     | 7.983   | 1.43e-15 *** |
| SEL_LINESE          | 0.6211   | 0.6497     | 0.956   | 0.3391       |
| noisetreatmentnoise | 0.4601   | 0.2137     | 2.153   | 0.0313 *     |

### Null models exploring best random structure for experiment 2

```
glmm1<-glmer(y~1+(1|birdID), family = poisson(link="log"), data=df)
glmm2<-glmer(y~1+(1|birdID)+(1|order), family = poisson(link="log"), data=df)
glmm3<-glmer(y~1+(order|birdID), family = poisson(link="log"), data=df)
```

#### Approach latency (in seconds)

|       | df | AICc      |
|-------|----|-----------|
| glmm1 | 2  | 1098.0117 |
| glmm2 | 3  | 1040.8442 |
| glmm3 | 4  | 418.5921  |

#### Attack latency (in seconds)

|       | df | AICc     |
|-------|----|----------|
| glmm1 | 2  | 1028.555 |
| glmm2 | 3  | 1030.790 |
| glmm3 | 4  | 432.045  |

### Summary of full model with best fitted random structure

```
glmer(y~target*noisetreatment+(order|birdID), family = poisson(link="log"), data=df)
```

#### Approach latency (in seconds)

Random effects:

| Groups Name        | Variance | Std.Dev. | Corr  |
|--------------------|----------|----------|-------|
| birdID (Intercept) | 0.57674  | 0.7594   |       |
| order              | 0.09232  | 0.3038   | -0.69 |

Number of obs: 107, groups: birdID, 12

Fixed effects:

|                                 | Estimate | Std. Error | z value | Pr(> z )    |
|---------------------------------|----------|------------|---------|-------------|
| (Intercept)                     | 4.84369  | 0.18002    | 26.906  | < 2e-16 *** |
| targetcolor                     | 0.32886  | 0.02977    | 11.046  | < 2e-16 *** |
| targetwhite                     | -0.75106 | 0.03621    | -20.743 | < 2e-16 *** |
| noisetreatmentnoise             | -0.09716 | 0.03401    | -2.857  | 0.00428 **  |
| targetcolor:noisetreatmentnoise | -0.45977 | 0.04345    | -10.583 | < 2e-16 *** |
| targetwhite:noisetreatmentnoise | 0.63173  | 0.04834    | 13.070  | < 2e-16 *** |

### Attack latency (in seconds)

Random effects:

| Groups Name        | Variance | Std.Dev. | Corr  |
|--------------------|----------|----------|-------|
| birdID (Intercept) | 6.3684   | 2.5236   |       |
| order              | 0.1868   | 0.4322   | -0.94 |

Number of obs: 104, groups: birdID, 12

Fixed effects:

|                                 | Estimate | Std. Error | z value | Pr(> z )     |
|---------------------------------|----------|------------|---------|--------------|
| (Intercept)                     | 4.97816  | 0.36050    | 13.809  | < 2e-16 ***  |
| targetcolor                     | 0.35121  | 0.03236    | 10.853  | < 2e-16 ***  |
| targetwhite                     | -0.70663 | 0.04285    | -16.490 | < 2e-16 ***  |
| noisetreatmentnoise             | 0.63045  | 0.02891    | 21.807  | < 2e-16 ***  |
| targetcolor:noisetreatmentnoise | -0.62856 | 0.03776    | -16.648 | < 2e-16 ***  |
| targetwhite:noisetreatmentnoise | 0.24316  | 0.04908    | 4.954   | 7.26e-07 *** |

### Effect of noise on attack latency during exp 3.

Models including choice of attack failed to run

```
glmm2<-glmer(y~noisetreatment +(order|birdID), family = poisson(link="log"), data=df)
```

Random effects:

| Groups Name        | Variance | Std.Dev. | Corr  |
|--------------------|----------|----------|-------|
| birdID (Intercept) | 2.0671   | 1.4378   |       |
| order              | 0.4438   | 0.6662   | -0.64 |

Number of obs: 43, groups: birdID, 11

Fixed effects:

|                     | Estimate | Std. Error | z value | Pr(> z )   |
|---------------------|----------|------------|---------|------------|
| (Intercept)         | 4.29257  | 0.34790    | 12.34   | <2e-16 *** |
| noisetreatmentnoise | 0.91707  | 0.03935    | 23.30   | <2e-16 *** |

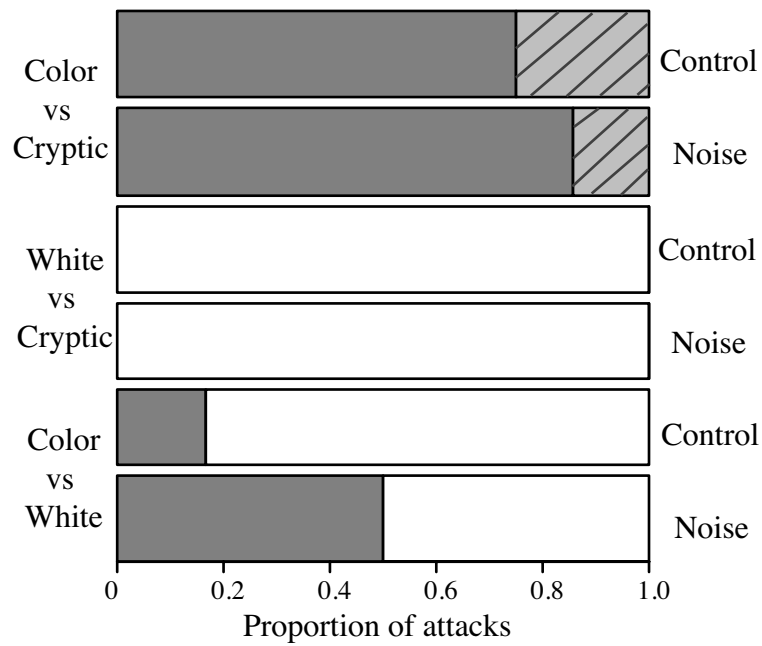

**Supplementary figure. Effect of crypsis on attack preference.** Birds were given a choice to attack two prey targets that differ in their level of crypsis. During control trials, birds preferred to attack the visually most conspicuous prey: Colour (grey) over Cryptic (barred), White (white) over Cryptic and White over Colour.
